# Supplementary material for: Evaluation of Benzene Adsorption onto Grass-Derived Biochar and Comparison of Adsorption Capacity via RSM (Response Surface Methodology)
Source: MDPI journal article supplement (doi:10.3390/jcs8040132), 2024-04-05
Supplement: s1 [file s1]

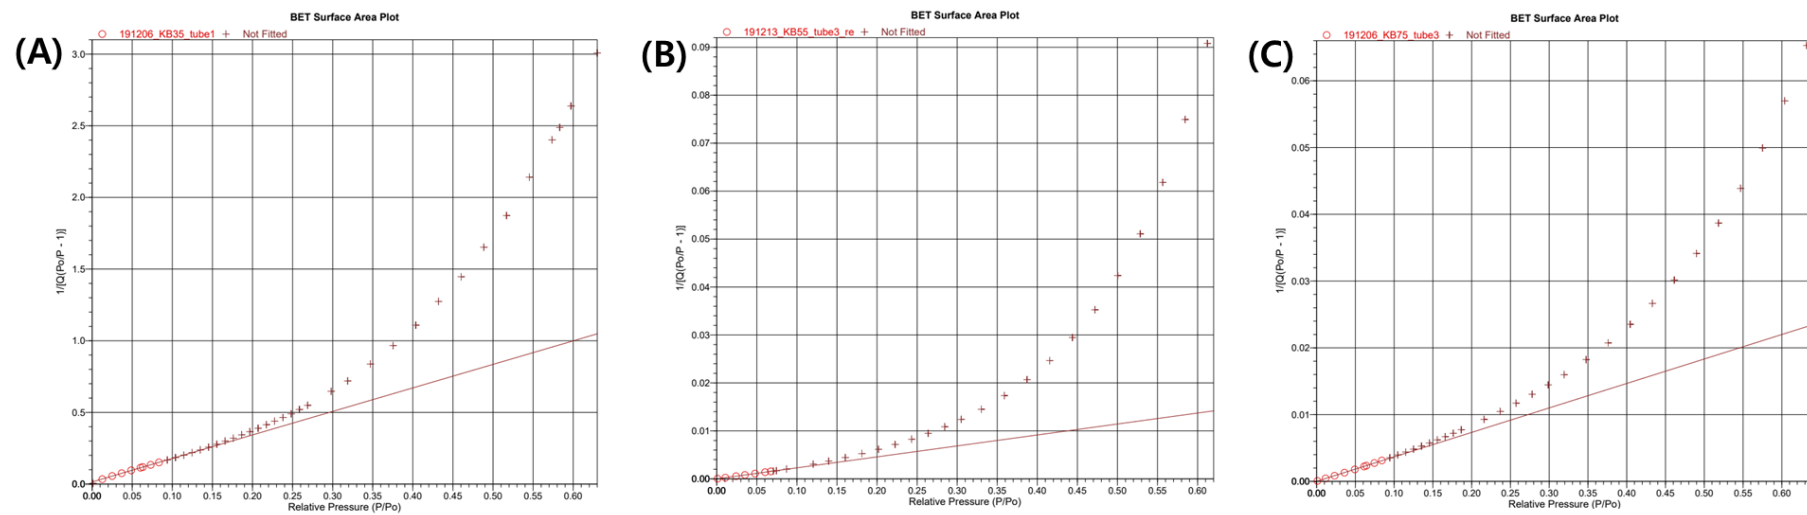

Fig. S1. BET surface area plot of KB-BC350 (A), KB-BC550 (B) and KB-BC750 (C).

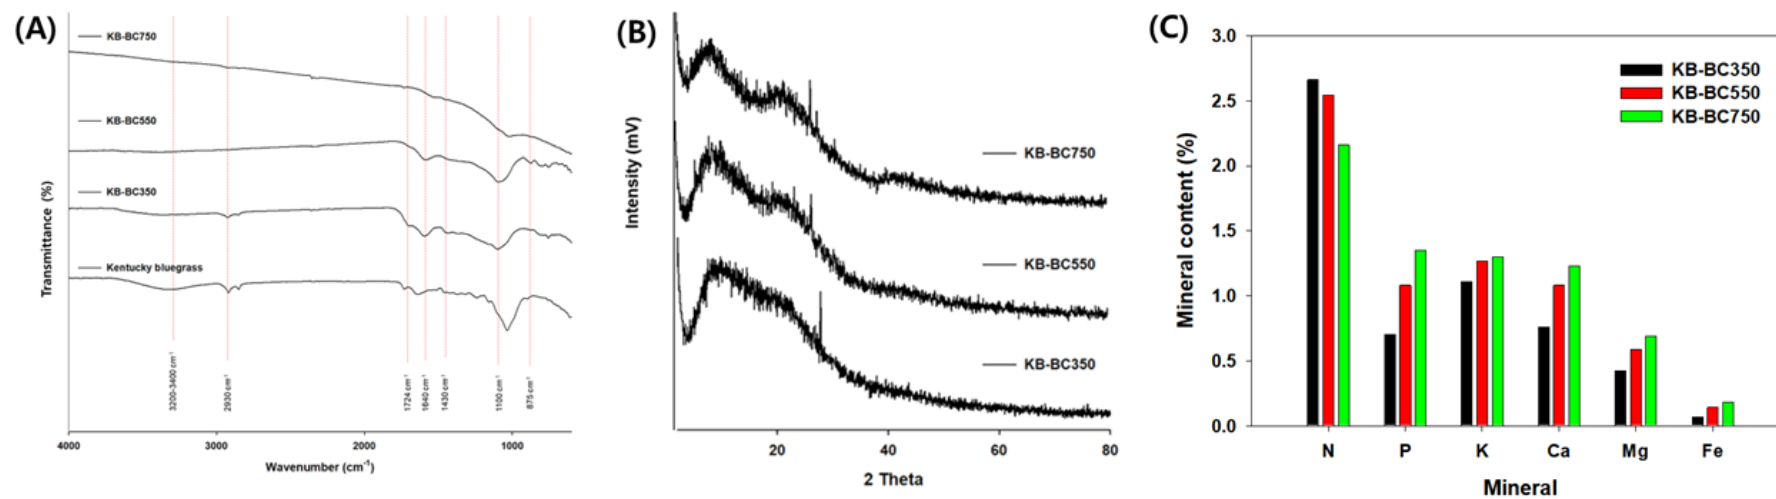

Fig. S2. Comparison of FT-IR spectrum (A) and mineral contents (B) of KB-BCs. Comparison of mineral content in different samples (C).

Table S1. Adsorption isotherm and kinetic models

| Model    | Equation                                                                                                                                                                                                                                                                                                                                                                                                                                                                                                                                                                                                                                                                                                                                                                                                                                                                                                                                                                                                                                             |
|----------|------------------------------------------------------------------------------------------------------------------------------------------------------------------------------------------------------------------------------------------------------------------------------------------------------------------------------------------------------------------------------------------------------------------------------------------------------------------------------------------------------------------------------------------------------------------------------------------------------------------------------------------------------------------------------------------------------------------------------------------------------------------------------------------------------------------------------------------------------------------------------------------------------------------------------------------------------------------------------------------------------------------------------------------------------|
|          | Freundlich: $Q_e = K_f C_e^{\frac{1}{n_f}}$                                                                                                                                                                                                                                                                                                                                                                                                                                                                                                                                                                                                                                                                                                                                                                                                                                                                                                                                                                                                          |
|          | Temkin: $Q_e = \frac{RT}{b_T} \ln (K_T C_e)$                                                                                                                                                                                                                                                                                                                                                                                                                                                                                                                                                                                                                                                                                                                                                                                                                                                                                                                                                                                                         |
|          | Langmuir: $Q_e = \frac{Q_m K_L C_e}{1 + K_L C_e}, R_L = \frac{1}{1 + K_L C_0}$                                                                                                                                                                                                                                                                                                                                                                                                                                                                                                                                                                                                                                                                                                                                                                                                                                                                                                                                                                       |
| Isotherm | <p>‘K<sub>f</sub>’ is a constant to indicate the adsorption capacity of BZ, ‘C<sub>e</sub>’ is the liquid-phase concentration of BZ at equilibrium (mg/L), 1/n<sub>f</sub> is an indicator of adsorption effectiveness, ‘C<sub>0</sub>’ is the liquid-phase concentration of BZ at initial (mg/L), ‘R’ is the universal constant (8.314 J mol<sup>-1</sup> K<sup>-1</sup>), ‘T’ is the temperature in terms of Kelvin, ‘b<sub>T</sub>’ is Temkin constant, ‘K<sub>T</sub>’ is equilibrium bond constant related to the maximum energy of bond, and ‘Q<sub>m</sub>’ is the maximum adsorption capacity of BZ (mg/g), ‘K<sub>L</sub>’ is the Langmuir constant (L/mg) related to the adsorption/desorption energy, ‘R<sub>L</sub>’ is separation constant.</p>                                                                                                                                                                                                                                                                                         |
|          | Pseudo-first order: $Q_t = Q_e (1 - \exp(-K_1 t))$                                                                                                                                                                                                                                                                                                                                                                                                                                                                                                                                                                                                                                                                                                                                                                                                                                                                                                                                                                                                   |
|          | Pseudo-second order: $Q_t = Q_e (1 - \exp(-K_2 t))$                                                                                                                                                                                                                                                                                                                                                                                                                                                                                                                                                                                                                                                                                                                                                                                                                                                                                                                                                                                                  |
|          | Elovich: $Q_t = \left(\frac{1}{b}\right) \ln ab + \left(\frac{1}{b}\right) \ln t, t_0 = \frac{1}{ab}$                                                                                                                                                                                                                                                                                                                                                                                                                                                                                                                                                                                                                                                                                                                                                                                                                                                                                                                                                |
|          | Intra-particle diffusion: $Q_t = K_i \sqrt{t} + C_i$                                                                                                                                                                                                                                                                                                                                                                                                                                                                                                                                                                                                                                                                                                                                                                                                                                                                                                                                                                                                 |
|          | Liquid film diffusion: $\ln(1 - F) = -K_{fd} t, F = \frac{Q_t}{Q_e}$                                                                                                                                                                                                                                                                                                                                                                                                                                                                                                                                                                                                                                                                                                                                                                                                                                                                                                                                                                                 |
| Kinetic  | <p>Two-compartment: <math>\frac{Q_t}{Q_{t=\infty}} = F_{fast} (1 - \exp^{-t K_{fast}}) + F_{slow} (1 - \exp^{-t K_{slow}}), F_{fast} + F_{slow} = 1</math></p> <p>‘Q<sub>t</sub>’ is the adsorption capacity of BZ onto biochar (mg/g) at time t (min), ‘Q<sub>e</sub>’ is the adsorption capacity of BZ onto biochar (mg/g) at equilibrium time, ‘K<sub>1</sub>’ is a rate constant of pseudo-first order, ‘K<sub>2</sub>’ is a rate constant of pseudo-second order, ‘a’ is a rate constant of chemisorption, ‘b’ is constant of the surface coverage, ‘K<sub>i</sub>’ is intra-particle diffusion rate constant (mg min<sup>0.5</sup>/g), ‘C<sub>i</sub>’ is a constant (mg/g), ‘K<sub>fd</sub>’ is BZ adsorption rate constant, ‘F<sub>fast</sub>’ is the mass fraction of fast, ‘F<sub>slow</sub>’ is the mass fraction of slow, ‘K<sub>fast</sub>’ is the first-order rate constant for transfer into fast (h<sup>-1</sup>), ‘K<sub>slow</sub>’ is the first-order rate constant for transfer into slow (h<sup>-1</sup>), and ‘h’ is hour.</p> |

Table S2. The adsorption isotherm parameters of benzene onto KB-BC550.

| Conc.<br>(mg/L) | Langmuir |         |       | Freundlich |       |       | Temkin |       |       |
|-----------------|----------|---------|-------|------------|-------|-------|--------|-------|-------|
|                 | $K_L$    | $Q_m$   | $R^2$ | $K_f$      | $n_f$ | $R^2$ | $b_T$  | $K_T$ | $R^2$ |
| 300             | 0.008    | 238.919 | 0.934 | 8.065      | 1.778 | 0.963 | 60.48  | 0.122 | 0.910 |

Table S3. The adsorption kinetic parameters of benzene onto KB-BC550.

| Conc.<br>(mg/L) | Pseudo-first order |         |       |       |       | Pseudo-second order |         |       |       |
|-----------------|--------------------|---------|-------|-------|-------|---------------------|---------|-------|-------|
|                 | $Q_e^a$            | $Q_e^b$ | $K_1$ | SSE   | $R^2$ | $Q_e^b$             | $K_2$   | SSE   | $R^2$ |
| 300             | 126.5              | 131.3   | 0.008 | 6.892 | 0.954 | 158.1               | 0.00005 | 8.806 | 0.926 |

  

| Conc.<br>(mg/L) | Elovich |       |        |        |       | Two-compartment first-order |              |            |            |            |       |       |
|-----------------|---------|-------|--------|--------|-------|-----------------------------|--------------|------------|------------|------------|-------|-------|
|                 | a       | b     | $t_0$  | SSE    | $R^2$ | $Q_e^b$                     | $F_{fast}$   | $F_{slow}$ | $K_{fast}$ | $K_{slow}$ | SSE   | $R^2$ |
| 300             | 2.624   | 0.028 | 13.581 | 10.444 | 0.896 | 103.3                       | 0.00000<br>9 | 1.270      | 4.982      | 0.483      | 6.892 | 0.954 |

  

| Conc.<br>(mg/L) | Liquid film diffusion |          |       |       | Intra-particle diffusion |       |          |          |          |       |      |       |
|-----------------|-----------------------|----------|-------|-------|--------------------------|-------|----------|----------|----------|-------|------|-------|
|                 | $Q_e^b$               | $K_{fd}$ | SSE   | $R^2$ | $Q_e^b$                  | $K_i$ | $K_{i1}$ | $K_{i2}$ | $K_{i3}$ | $C_i$ | SSE  | $R^2$ |
| 300             | 131.3                 | 0.008    | 6.828 | 0.941 | 94.1                     | 4.270 | 5.097    | 0.971    | 0.518    | 30.5  | 14.6 | 0.795 |

$Q_e^a$  and  $Q_e^b$  are the adsorption capacity of BZ onto biochar (mg/g) at equilibrium time by experiment and calculation, respectively.

Table S4. Effect of different combination of various variables on adsorption capacity (mg BZ/g BC) of benzene analyzed by using Box-Behnken response surface design.

| Run | Independent variables  |                               |                    | Response (adsorption capacity, mg BZ/g BC; removal efficiency, %) |                     |
|-----|------------------------|-------------------------------|--------------------|-------------------------------------------------------------------|---------------------|
|     | X <sub>1</sub> (g)     | X <sub>2</sub> (mg/L;<br>ppm) | X <sub>3</sub> (h) | Benzene                                                           |                     |
|     | Quantity of<br>biochar | Concentration<br>of benzene   | Reaction time      | Experimental<br>(mg BZ/g BC)                                      | Experimental<br>(%) |
| 1   | 0.002                  | 100                           | 7                  | 40.50 ± 8.14                                                      | 11.98 ± 2.41        |
| 2   | 0.010                  | 300                           | 7                  | 99.67 ± 3.01                                                      | 73.80 ± 2.23        |
| 3   | 0.002                  | 300                           | 7                  | 115.20 ± 48.77                                                    | 17.06 ± 7.22        |
| 4   | 0.010                  | 200                           | 12                 | 54.09 ± 1.92                                                      | 60.05 ± 2.13        |
| 5   | 0.006                  | 200                           | 7                  | 61.27 ± 4.41                                                      | 40.80 ± 2.94        |
| 6   | 0.002                  | 200                           | 12                 | 55.35 ± 21.10                                                     | 12.25 ± 4.68        |
| 7   | 0.006                  | 200                           | 7                  | 64.35 ± 6.18                                                      | 42.88 ± 4.12        |
| 8   | 0.006                  | 100                           | 12                 | 50.17 ± 0.59                                                      | 44.54 ± 0.52        |
| 9   | 0.006                  | 200                           | 7                  | 65.62 ± 7.98                                                      | 43.73 ± 5.32        |
| 10  | 0.010                  | 100                           | 7                  | 42.03 ± 3.12                                                      | 62.24 ± 4.62        |
| 11  | 0.006                  | 100                           | 2                  | 31.05 ± 6.07                                                      | 27.58 ± 5.04        |
| 12  | 0.006                  | 300                           | 12                 | 143.92 ± 5.10                                                     | 63.96 ± 2.26        |
| 13  | 0.010                  | 200                           | 2                  | 42.97 ± 3.17                                                      | 47.75 ± 3.52        |
| 14  | 0.006                  | 300                           | 2                  | 119.40 ± 7.02                                                     | 53.04 ± 3.12        |
| 15  | 0.002                  | 200                           | 2                  | 37.35 ± 14.24                                                     | 8.26 ± 3.16         |
